# Supplementary material for: pRb controls Estrogen Receptor alpha protein stability and activity
Source: PubMed Central journal article supplement (PMC3757244; doi:10.18632/oncotarget.1036), 2013-06-03
Supplement: oncotarget-04-875-s001.pdf [file oncotarget-04-875-s001.pdf]

pRb controls Estrogen Receptor alpha protein stability and activity  
- Caligiuri et al

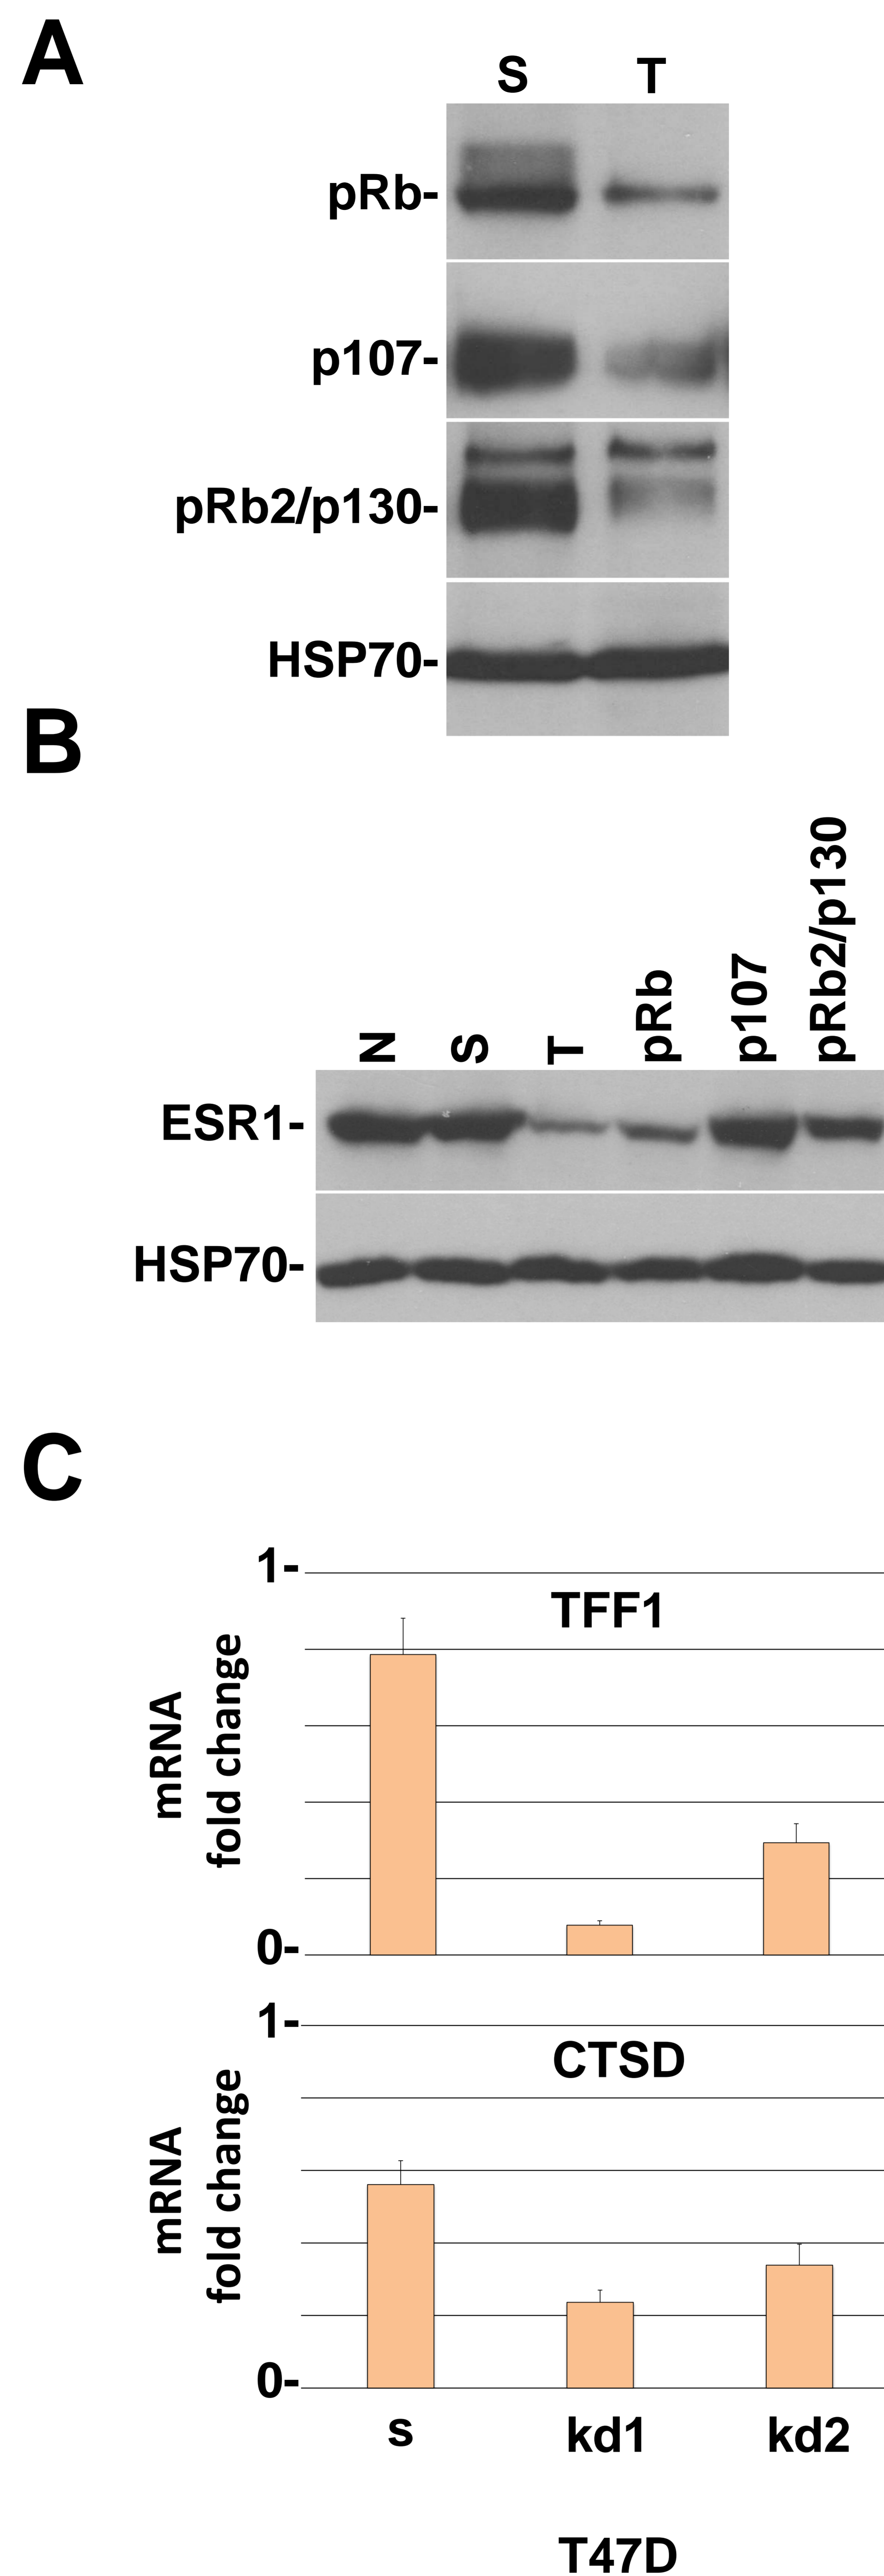

**Supplemental Figure 1:** (A) Testing the kd efficiency of *pRb*, *p107* and *pRb2/p130*. (B) Analysis of *pRb*, *p107* and *pRb2/p130* MCF7 kd cells. Only the loss of *RB1* down regulates the expression of the ESR1 protein. HSP70 was utilized as a loading control. T, triple knock down cells. (C) Loss of *RB1* down regulates the expression of *TFF1* and *CTSD*, two target genes of ESR1.

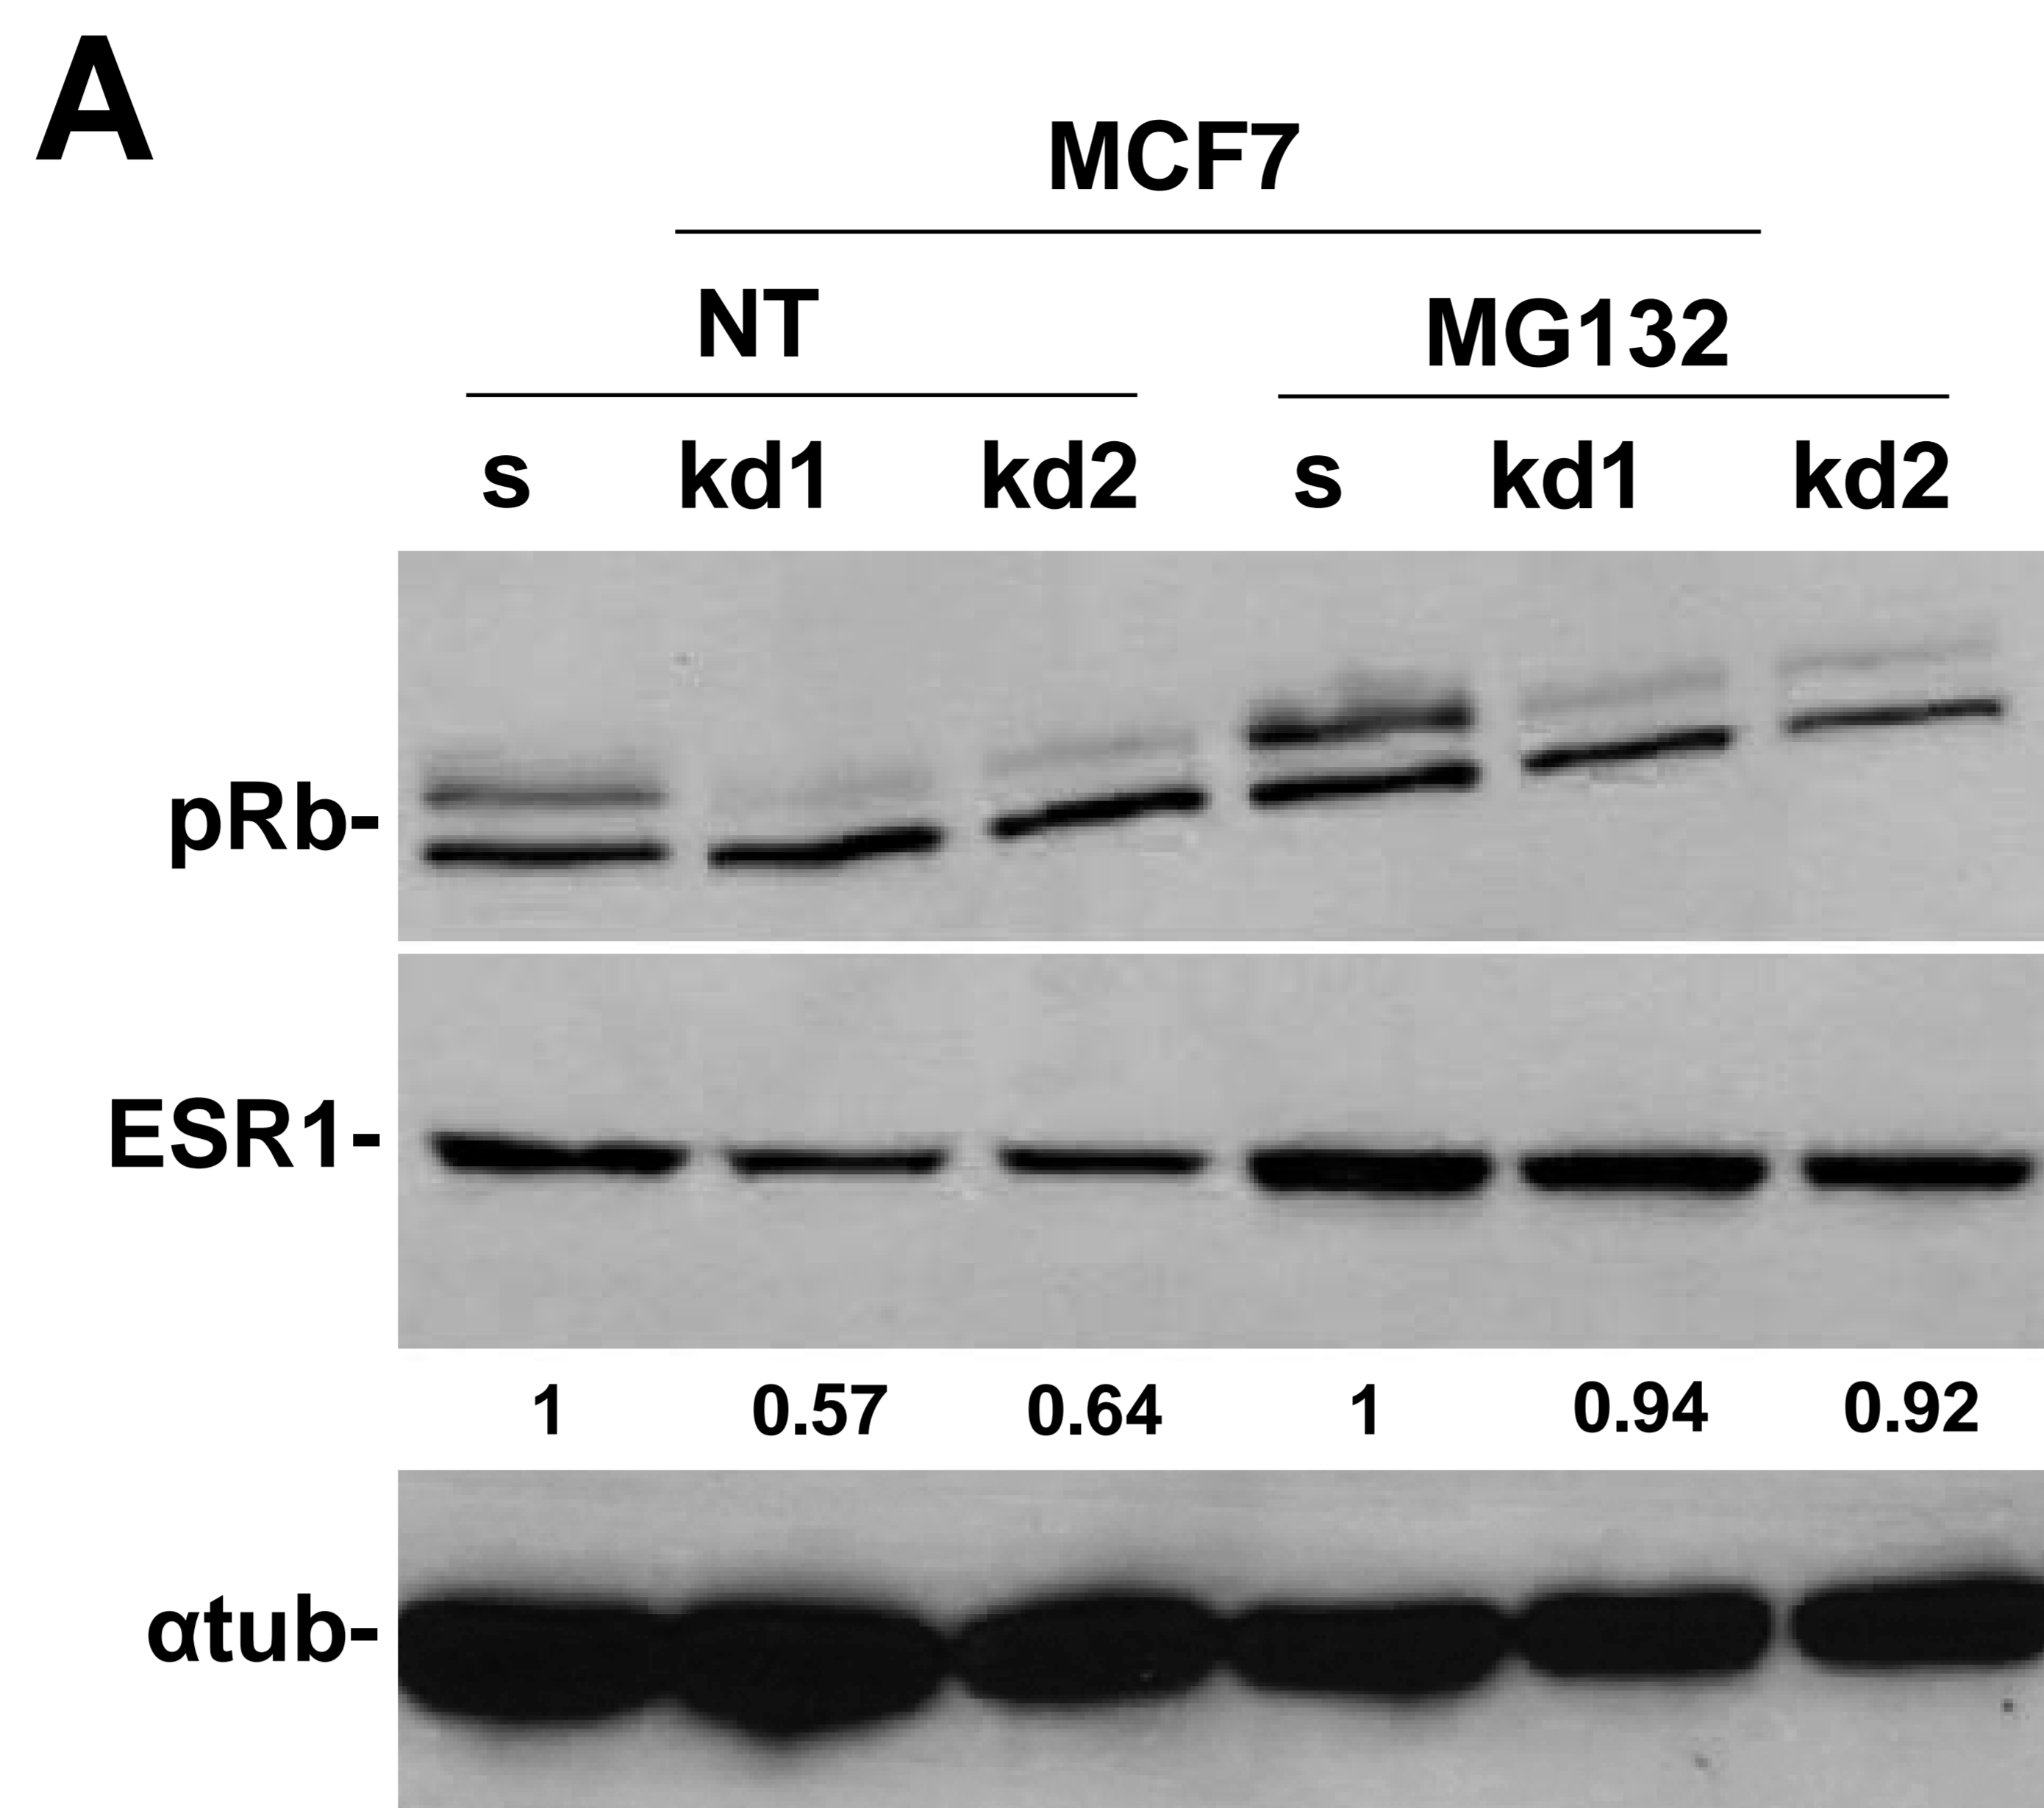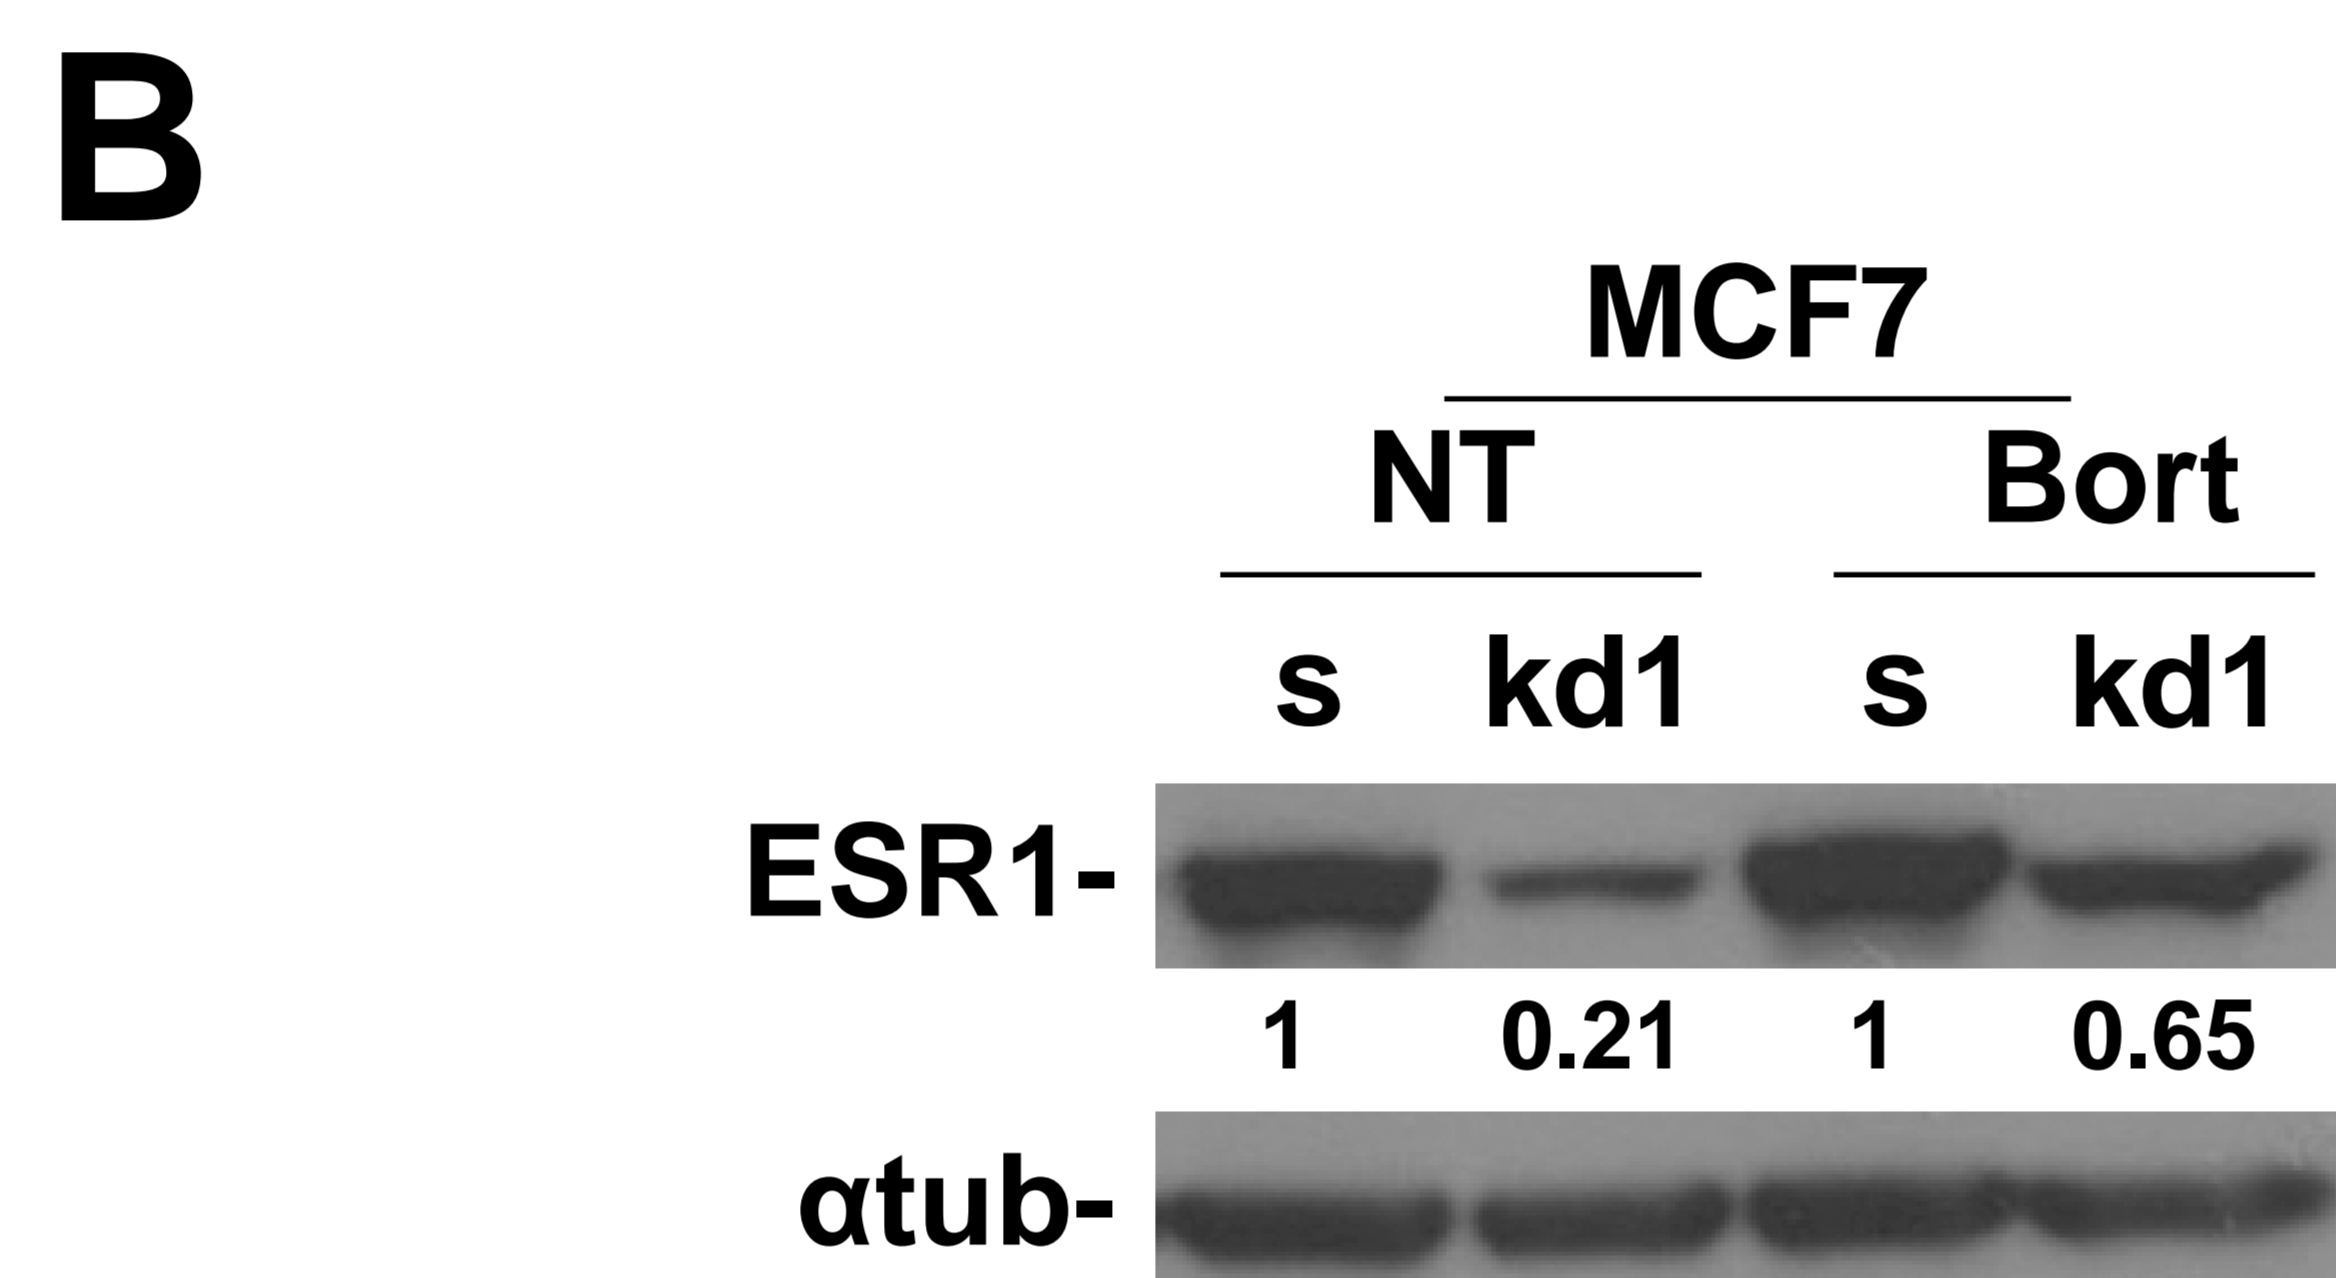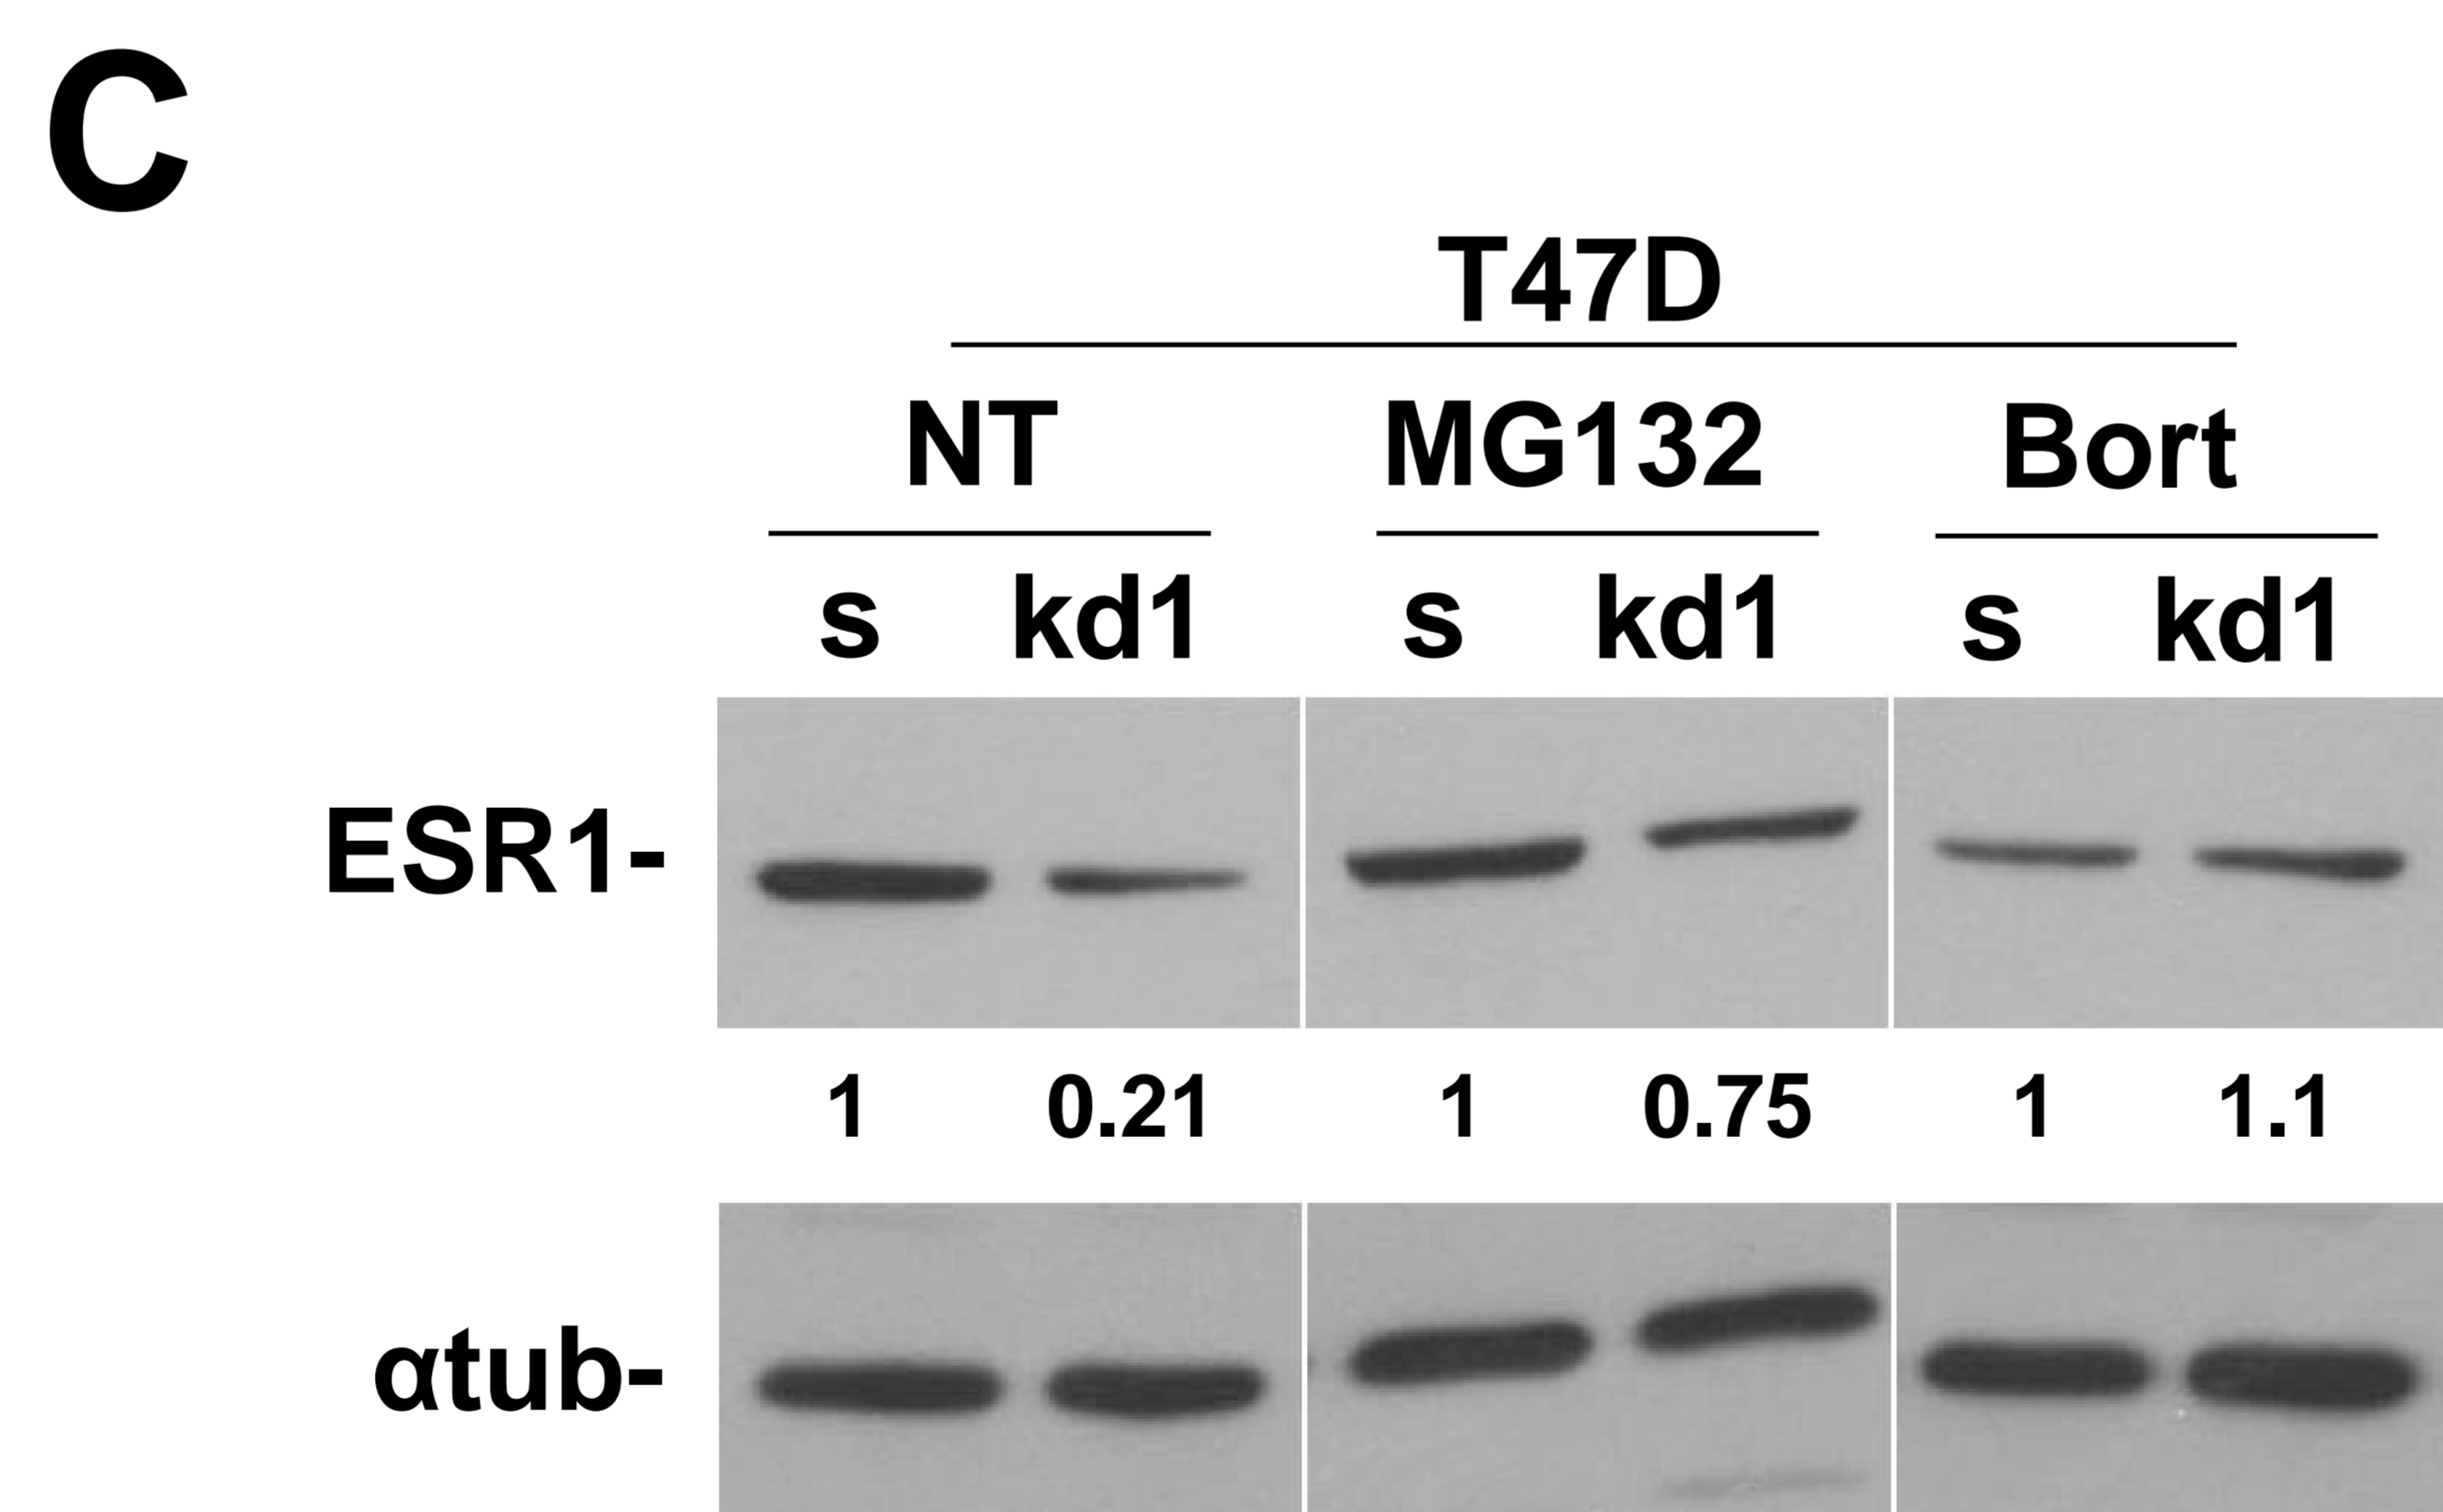

**Supplemental Figure 2: (A)** MG132 treatment recovered the expression of ESR1 in *RB1* kd1 and kd2 MCF7 cells. **(B)** Bortezomib provides the same results as MG132 in *RB1* kd1 cells. **(C)** MG132 and Bortezomib rescue the expression of ESR1 in T47D *RB1* kd1 cells.
